# Supplementary material for: Designing and defining dynamic protein cage nanoassemblies in solution
Source: PubMed Central journal article supplement — Sci Adv. 2016 Dec 14;2(12):e1501855. doi: 10.1126/sciadv.1501855 (PMC5156514; doi:10.1126/sciadv.1501855), 2016-12-14
Supplement: 1501855_SM.pdf [file 1501855_SM.pdf]

## Supplementary Materials for

### Designing and defining dynamic protein cage nanoassemblies in solution

Yen-Ting Lai, Greg L. Hura, Kevin N. Dyer, Henry Y. H. Tang, John A. Tainer, Todd O. Yeates

Published 14 December 2016, *Sci. Adv.* **2**, e1501855 (2016)

DOI: 10.1126/sciadv.1501855

#### The PDF file includes:

- fig. S1. Position of the Y51A mutation in *PCquad*.
- fig. S2. Crystallographic density maps of *PCquad* as found in PDB entry 4QF0.
- fig. S3. Testing the concentration dependence of the cage systems.
- fig. S4. Scattering profiles and their fits.
- fig. S5. Heat map and force plot analysis using  $V_R$  and  $\chi^2$ .
- fig. S6. Comparing RMSD changes measured from atomic models to the similarity of SAXS calculated from the same atomic models.
- fig. S7. Purity of *PCtrip* and *PCquad* after affinity purification and SEC.
- fig. S8. *PCtrip* multimerization as a function of pH as probed by SEC.
- fig. S9. Minimalist ensembles with nearly equivalent fits to SAXS data.
- table S1. SAXS-related parameters estimated from crystal structures.
- table S2. Summary of buffer effects on SAXS parameters of *PCtrip*.
- table S3. Summary of buffer effects on SAXS parameters of *PCquad*.
- table S4. Multimeric composition from fitting SAXS results from *PCtrip*.
- table S5. Multimeric composition from fitting SAXS results from *PCquad*.

#### Other Supplementary Material for this manuscript includes the following:

(available at [advances.sciencemag.org/cgi/content/full/2/12/e1501855/DC1](http://advances.sciencemag.org/cgi/content/full/2/12/e1501855/DC1))

- movie S1 (.mp4 format). Structural morphing between idealized symmetric structure and most compact asymmetric crystal structure.

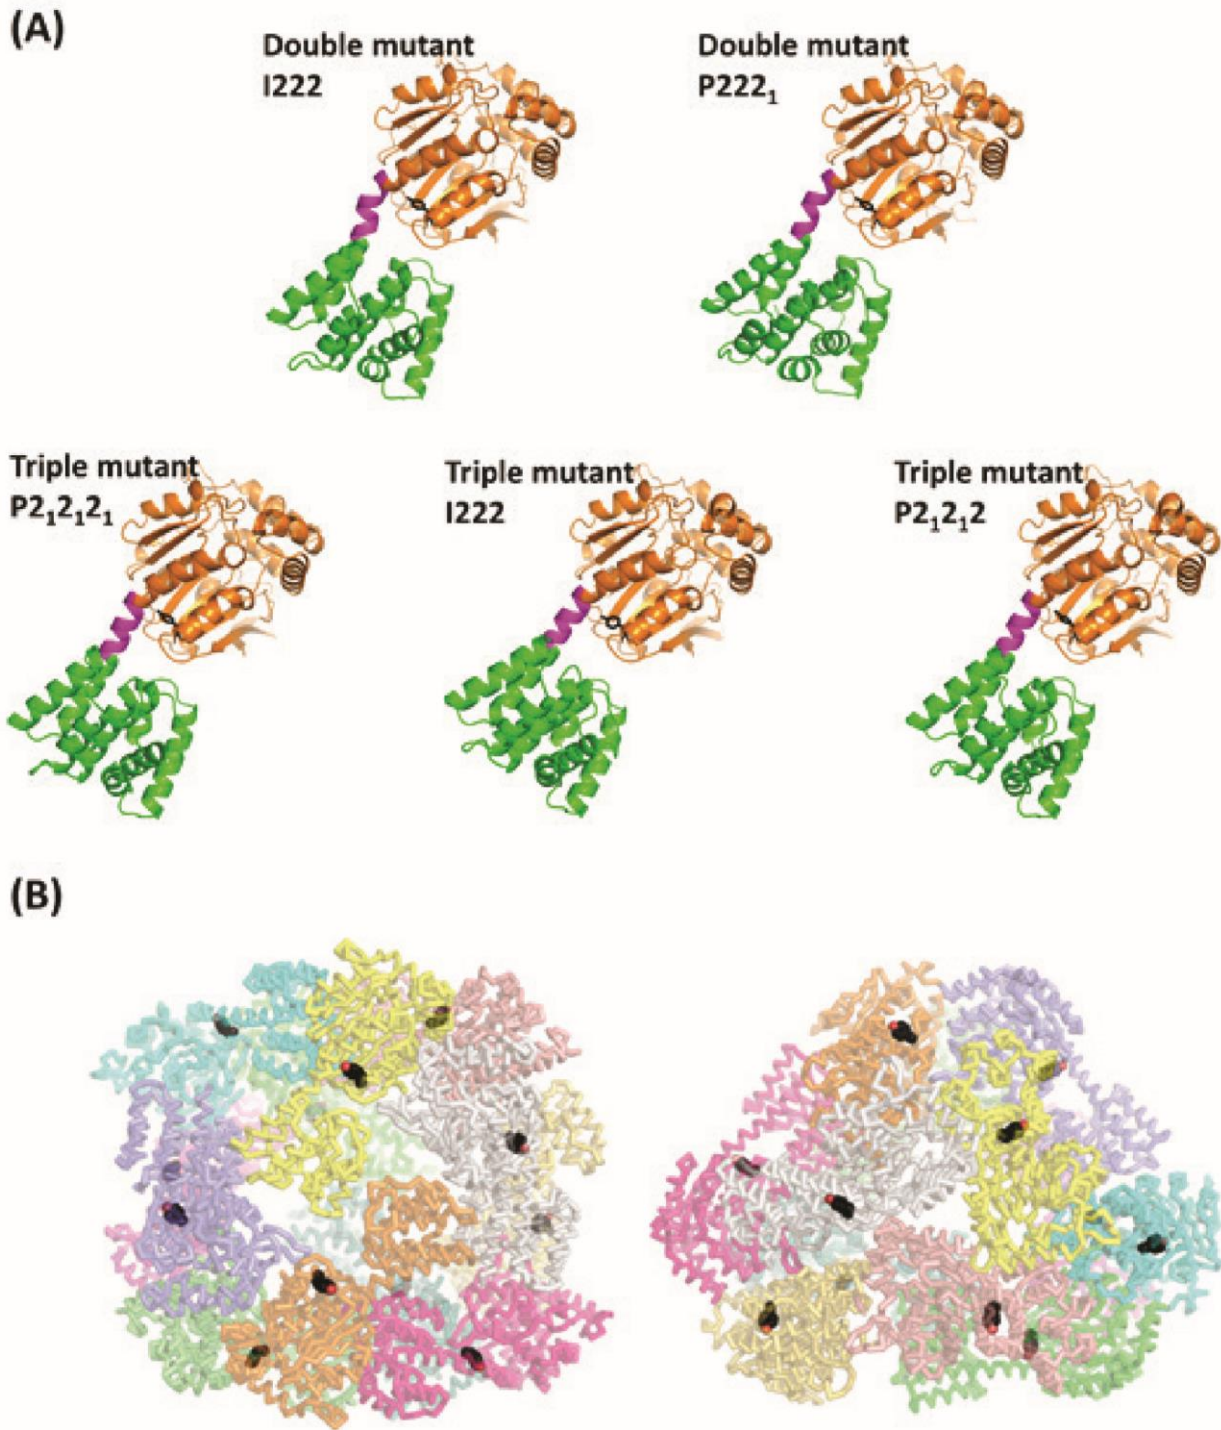

**fig. S1. Position of the Y51A mutation in PCquad.** (A) The tyrosine residue at position 51 consistently correlates with the helix bending in all available crystal structures. The tyrosine is shown in black stick. (B) The tyrosine residue shown in the context of a cage (PDB ID 4ITV, the most asymmetric cage), along the approximate two-fold symmetry (left) or along the approximate three-fold symmetry (right). Tyrosine residues are shown in black and red spheres.

table S1. SAXS-related parameters estimated from crystal structures.

| PDB id | Mutant    | Space group       | $R_g$ (Å) | $D_{max}$ (Å) | M.W. (kDa) | Reference             |
|--------|-----------|-------------------|-----------|---------------|------------|-----------------------|
| 3VDX   | Double    | I222              | 56.1      | 158.7         | 602        | <i>Science</i> (2012) |
| 4D9J   | Double    | P222 <sub>1</sub> | 56.7      | 159.6         | 602        | <i>Science</i> (2012) |
| 4IVJ   | Triple    | I222              | 61.6      | 168.7         | 602        | <i>JACS</i> (2013)    |
| 4IQ4   | Triple    | P21212            | 56.5      | 157.5         | 602        | <i>JACS</i> (2013)    |
| 4ITV   | Triple    | P212121           | 58.2      | 171.6         | 602        | <i>JACS</i> (2013)    |
| 4QES   | Quadruple | I222              | 60.9      | 164.2         | 602        | This study            |
| 4QF0   | Quadruple | P21212            | 64.2      | 167.4         | 602        | This study            |
| 4QFF   | Quadruple | P212121           | 63.0      | 176.2         | 602        | This study            |

**table S2. Summary of buffer effects on SAXS parameters of PCtrip.**

| Salt conc. (mM) | pH | Rg (Å) | Dmax (Å) | Porod Exponent | Mass(kDa) |
|-----------------|----|--------|----------|----------------|-----------|
| 10              | 7  | 56.9   | 158      | 3.7            | 564       |
| 10              | 8  | 58.3   | 160      | 3.6            | 575       |
| 10              | 9  | 59.5   | 169      | 3.6            | 562       |
| 100             | 6  | 59.2   | 165      | 3.6            | 542       |
| 100             | 7  | 60.0   | 159      | 3.7            | 576       |
| 100             | 8  | 59.4   | 176      | 3.3            | 580       |
| 100             | 9  | 62.1   | 182      | 3.4            | 518       |
| 300             | 4  | 63.9   | 175      | 3.4            | 526       |
| 300             | 5  | 62.1   | 170      | 3.7            | 542       |
| 300             | 6  | 59.8   | 156      | 3.6            | 587       |
| 300             | 7  | 60.1   | 158      | 3.6            | 545       |
| 300             | 8  | 60.2   | 180      | 3.6            | 570       |
| 500             | 5  | 63.4   | 175      | 3.8            | 522       |
| 500             | 6  | 63.4   | 172      | 3.8            | 605       |
| 500             | 7  | 62.3   | 175      | 3.7            | 534       |

**table S3. Summary of buffer effects on SAXS parameters of PCquad.**

| Salt conc. (mM) | pH | Rg (Å) | Dmax (Å) | Porod Exponent | Mass(kDa) |
|-----------------|----|--------|----------|----------------|-----------|
| 10              | 8  | 59.7   | 180      | 4              | 616       |
| 10              | 9  | 60.1   | 179      | 4              | 597       |
| 100             | 6  | 63.0   | 155      | 3.8            | 569       |
| 100             | 7  | 60.2   | 166      | 3.8            | 617       |
| 100             | 8  | 60.9   | 180      | 3.7            | 605       |
| 100             | 9  | 63.3   | 175      | 3.6            | 564       |
| 300             | 4  | 66.0   | 164      | 3.9            | 558       |
| 300             | 5  | 62.5   | 166      | 3.9            | 588       |
| 300             | 6  | 63.4   | 165      | 3.9            | 636       |
| 300             | 7  | 64.8   | 175      | 3.7            | 579       |
| 300             | 8  | 62.8   | 169      | 3.6            | 552       |
| 300             | 9  | 64.4   | 175      | 3.9            | 469       |
| 500             | 4  | 69.9   | 165      | 3.9            | 568       |
| 500             | 5  | 63.2   | 170      | 3.8            | 608       |
| 500             | 6  | 61.6   | 157      | 3.5            | 625       |
| 500             | 7  | 63.0   | 172      | 3.5            | 500       |
| 500             | 8  | 64.2   | 180      | 2.9            | 553       |
| 500             | 9  | 66.4   | 150      | 3.6            | 467       |



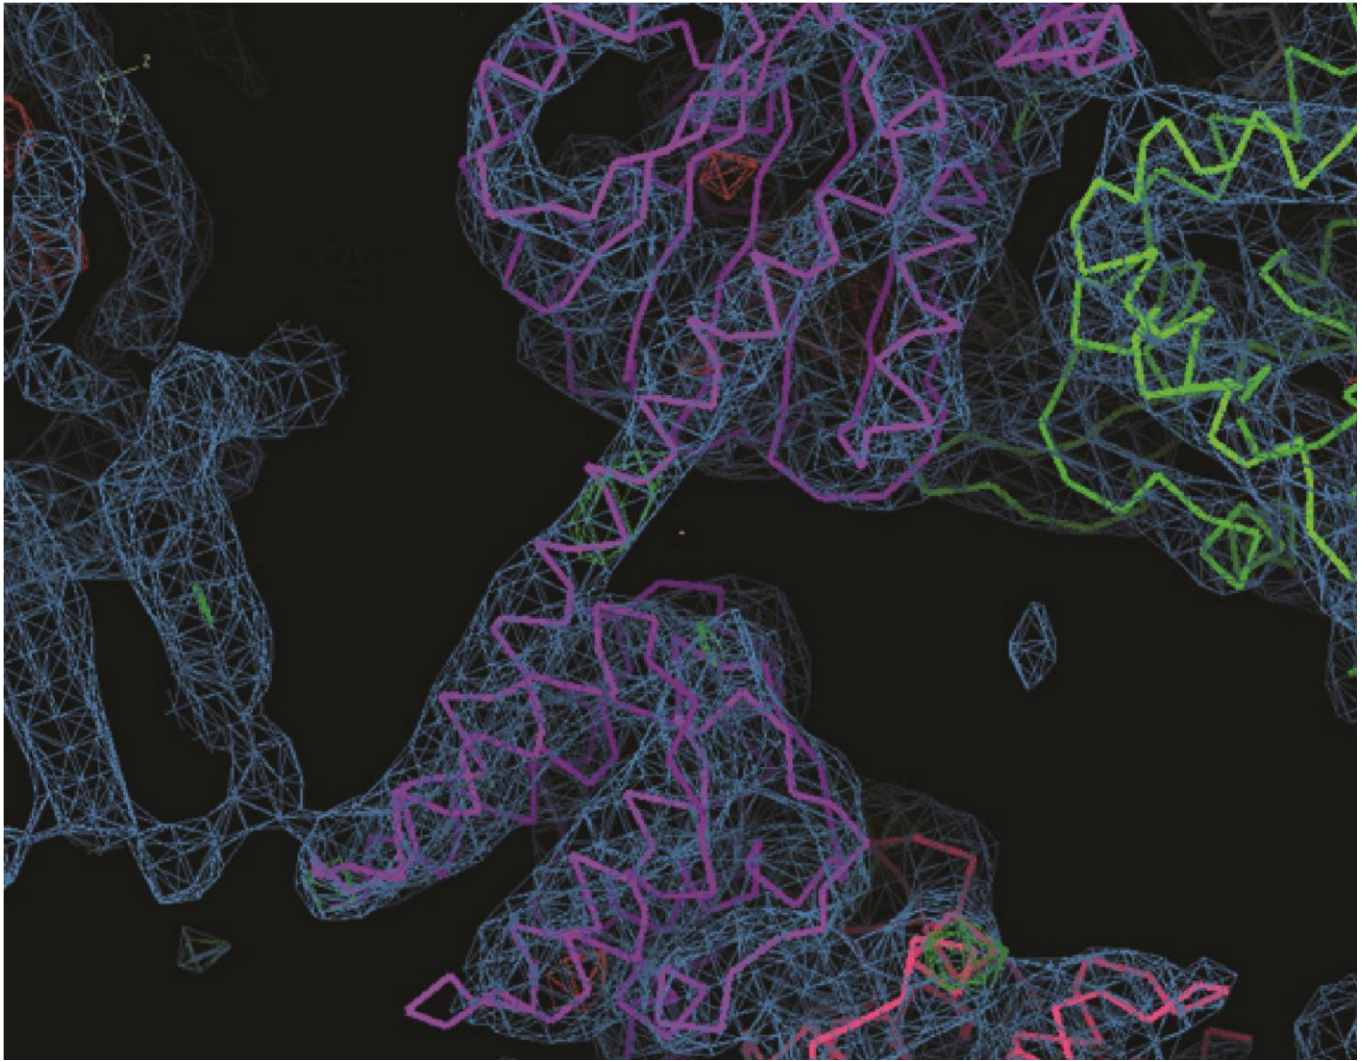

**fig. S2. Crystallographic density maps of *PCquad* as found in PDB entry 4QF0.** After all trimeric domains and dimeric domains were located successfully by molecular replacement, the positive density (green blob, center of the image) could be seen. Here the helix linker is included for clarity. Ribbons with different colors represent different chains in the structure. A complete chain in purple is shown; the trimeric domain of the purple chain is located at the top of the image and the dimeric domain located close to the bottom.

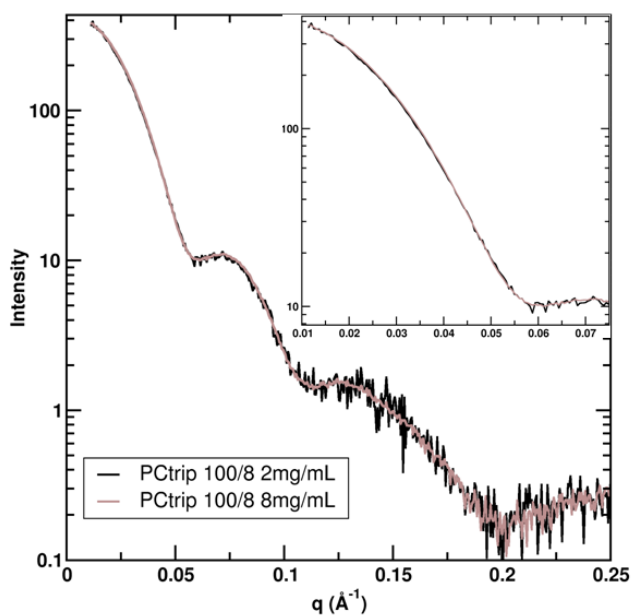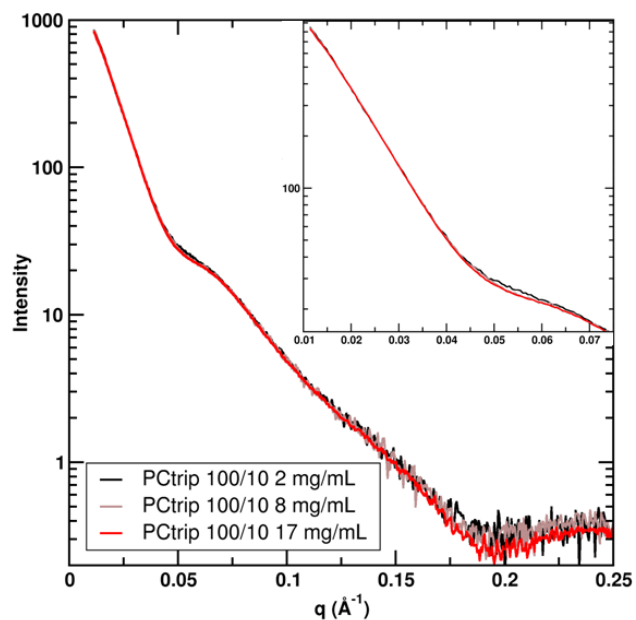

**fig. S3. Testing the concentration dependence of the cage systems.** *PCtrip* and other cage variants were collected at several concentrations in purifying conditions of 100mM NaCl at pH8 (right). *PCtrip* was also tested for concentration dependence in conditions (100mM NaCl at pH 10) where high concentrations of trimer were found present. Varying concentration in both conditions has a much smaller to no affect relative to modifications in pH or salt.

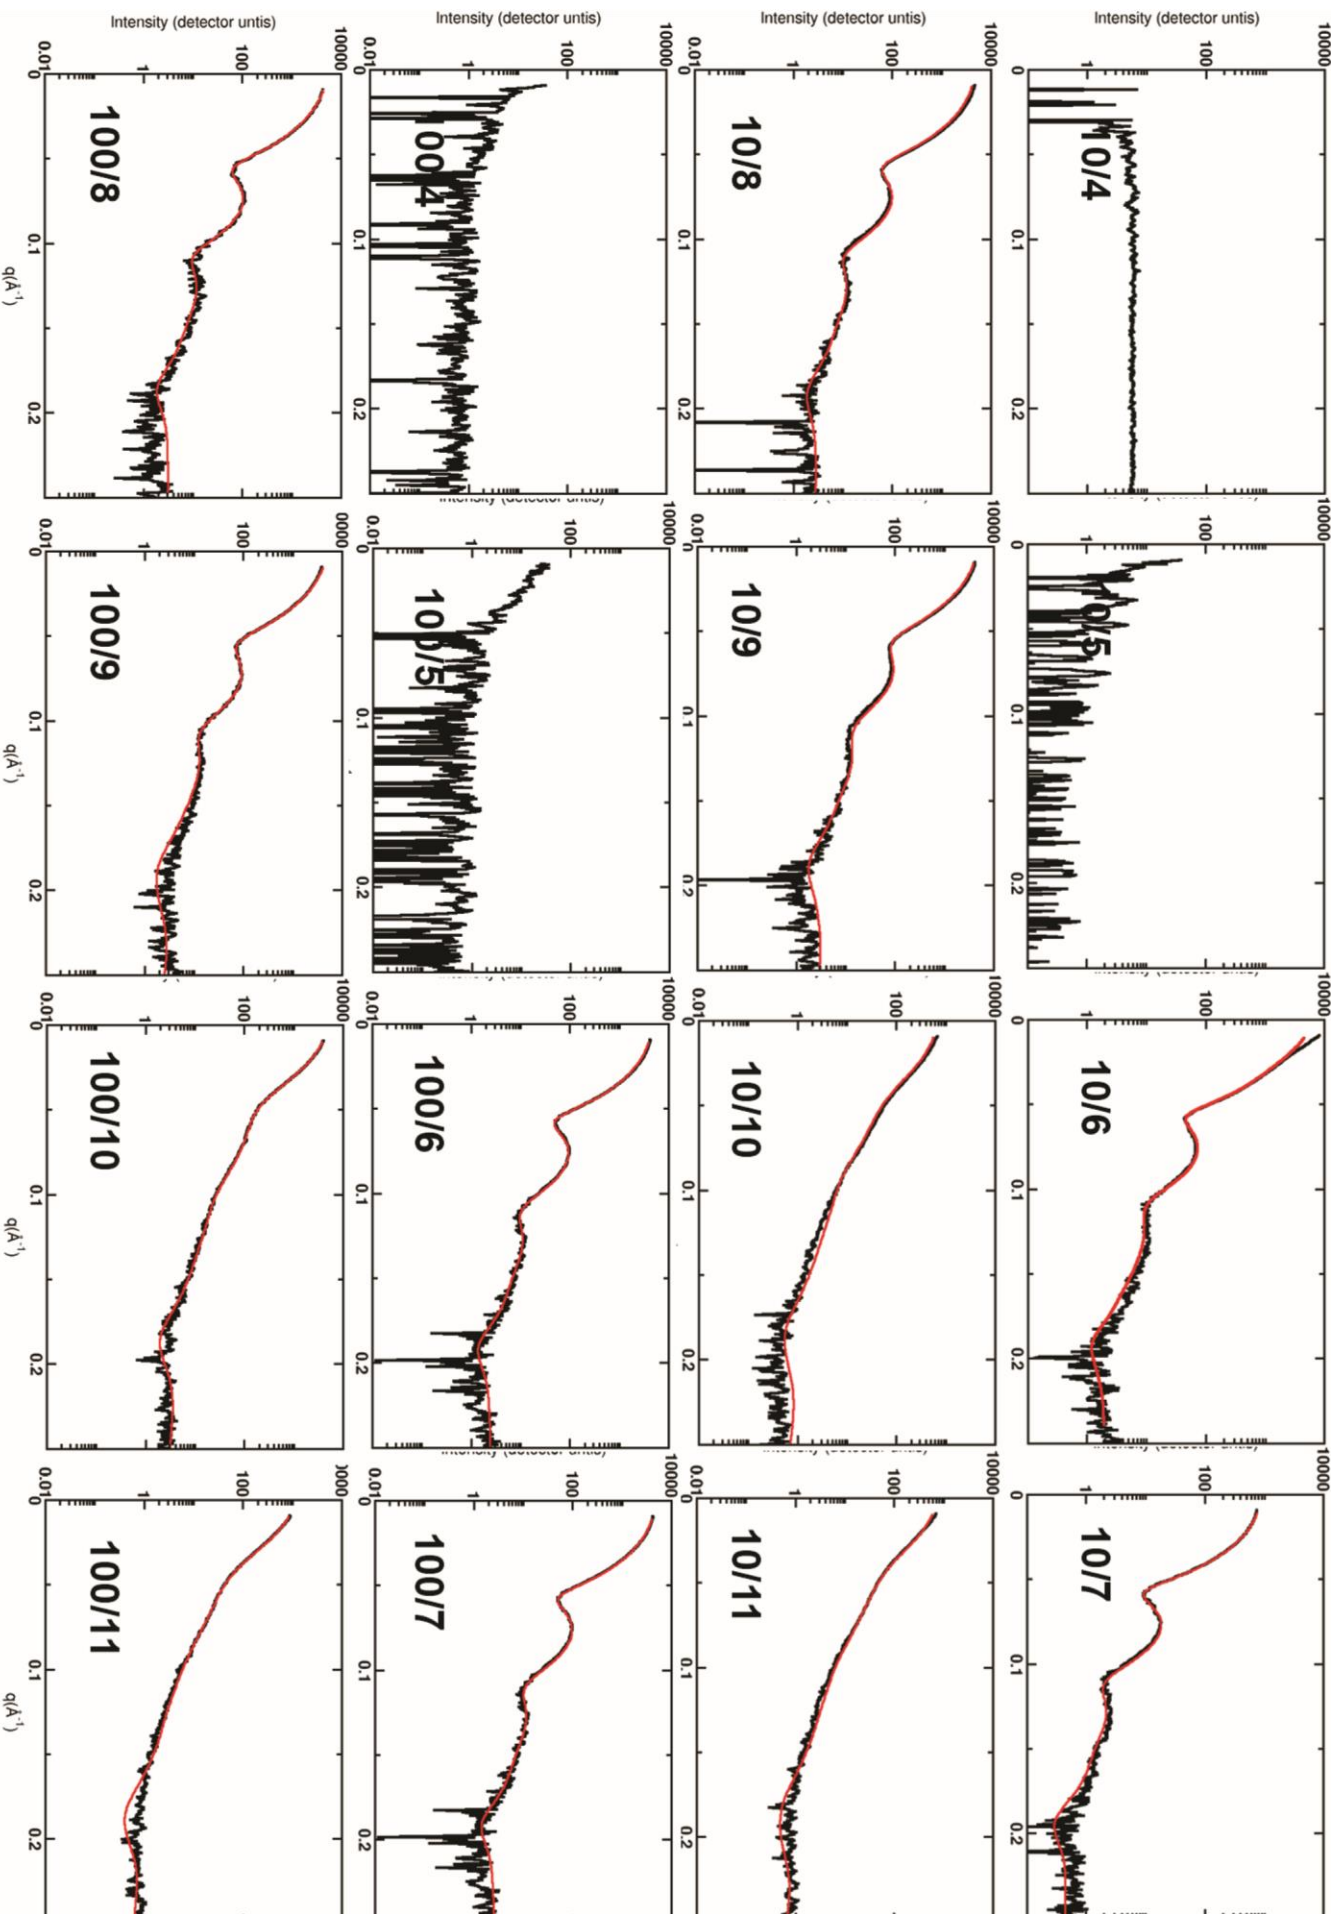

**fig. S4. Page 1 of 4. Scattering profiles and their fits.** pH, Cage variant designated at bottom center of page.

**Trip** Salt and pH are indicated in lower left corner for each profile mM/

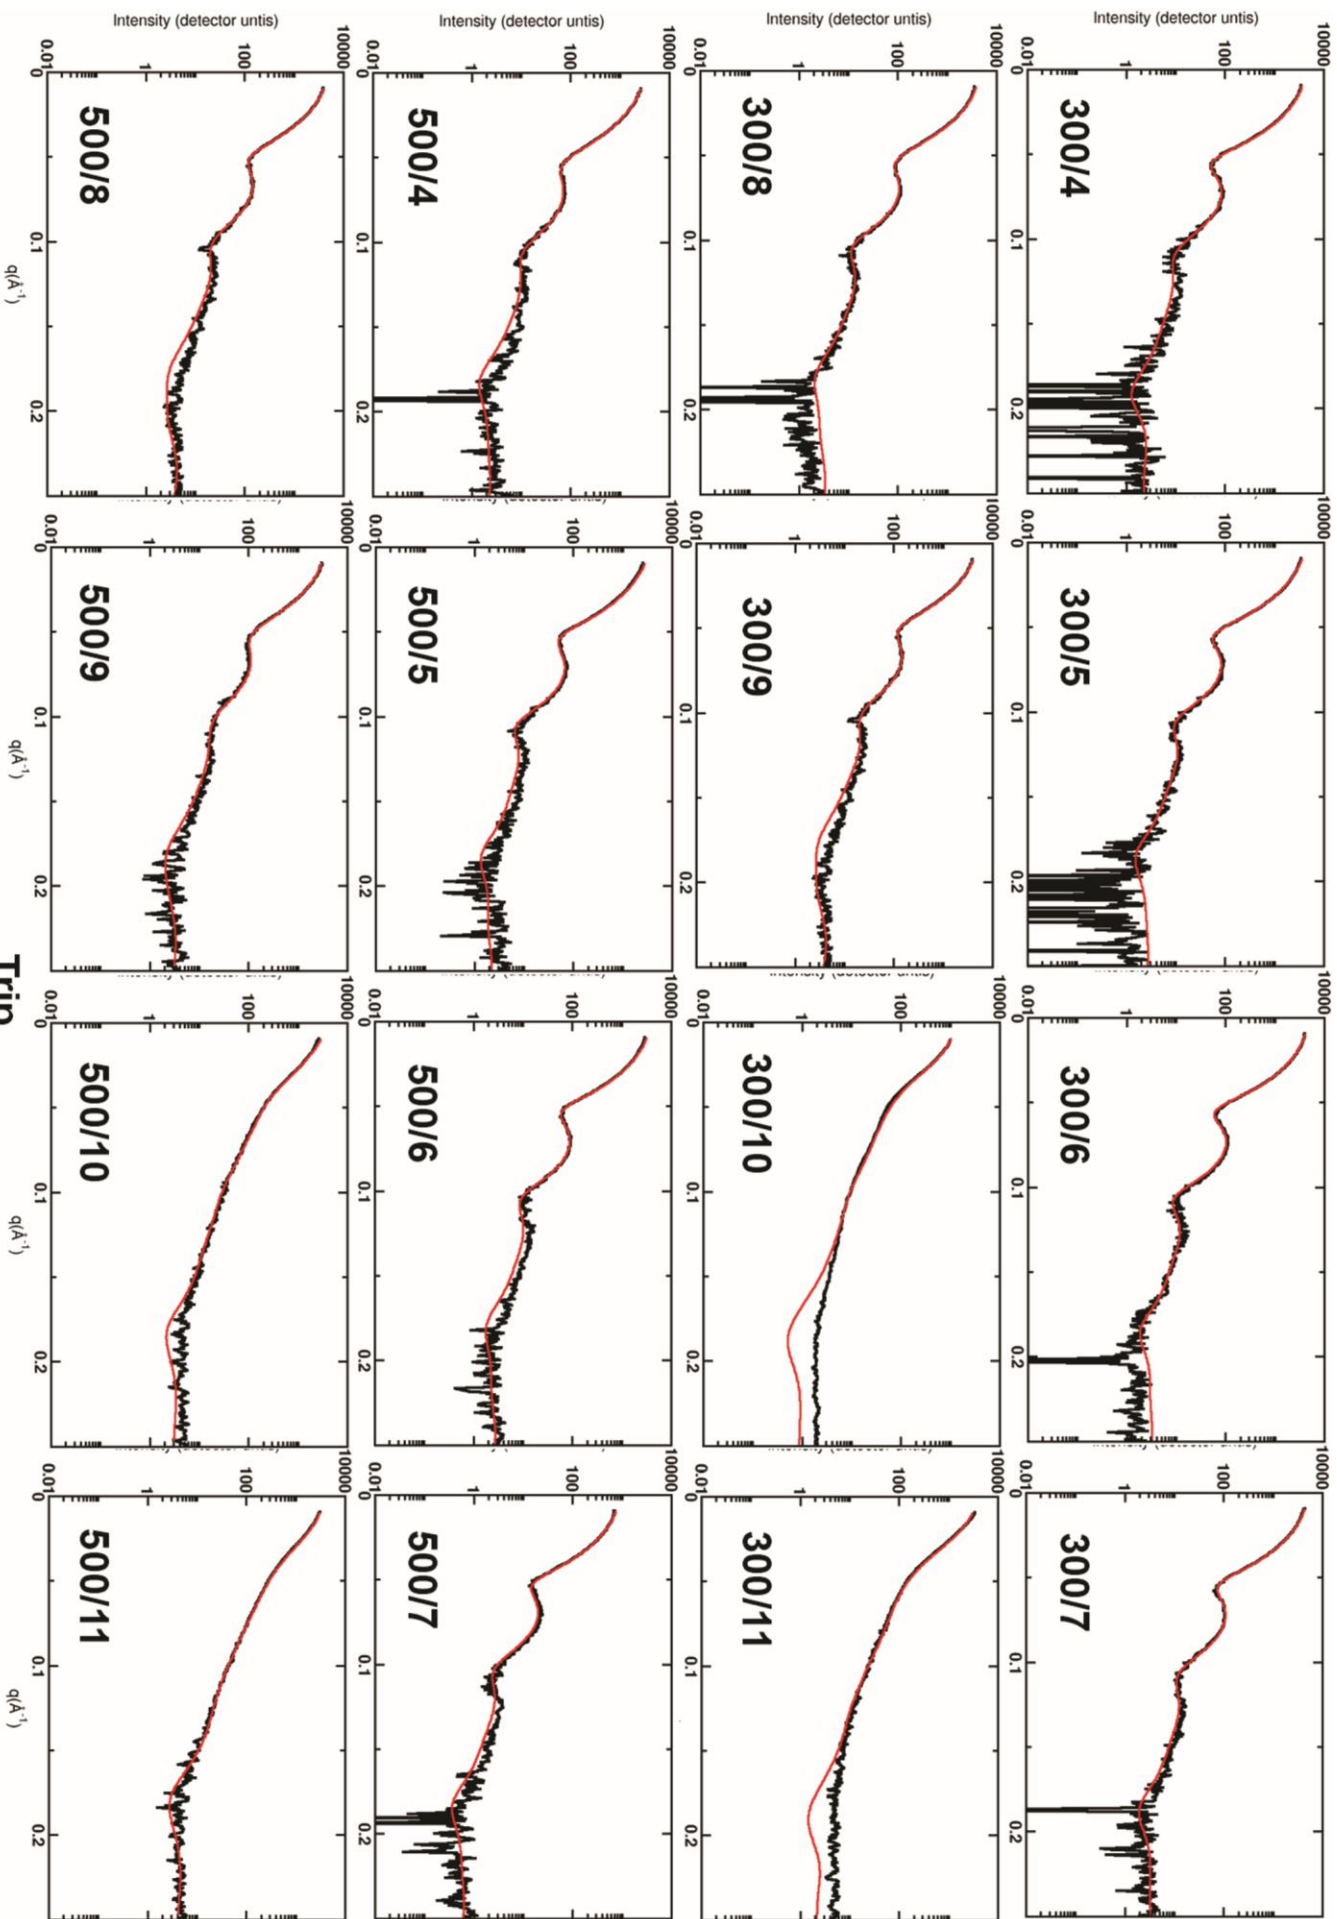

**fig. S4. Page 2 of 4. Scattering profiles and their fits.** pH. Cage variant designated at bottom center of page.

Salt and pH are indicated in lower left corner for each profile mM/

**Tripl**



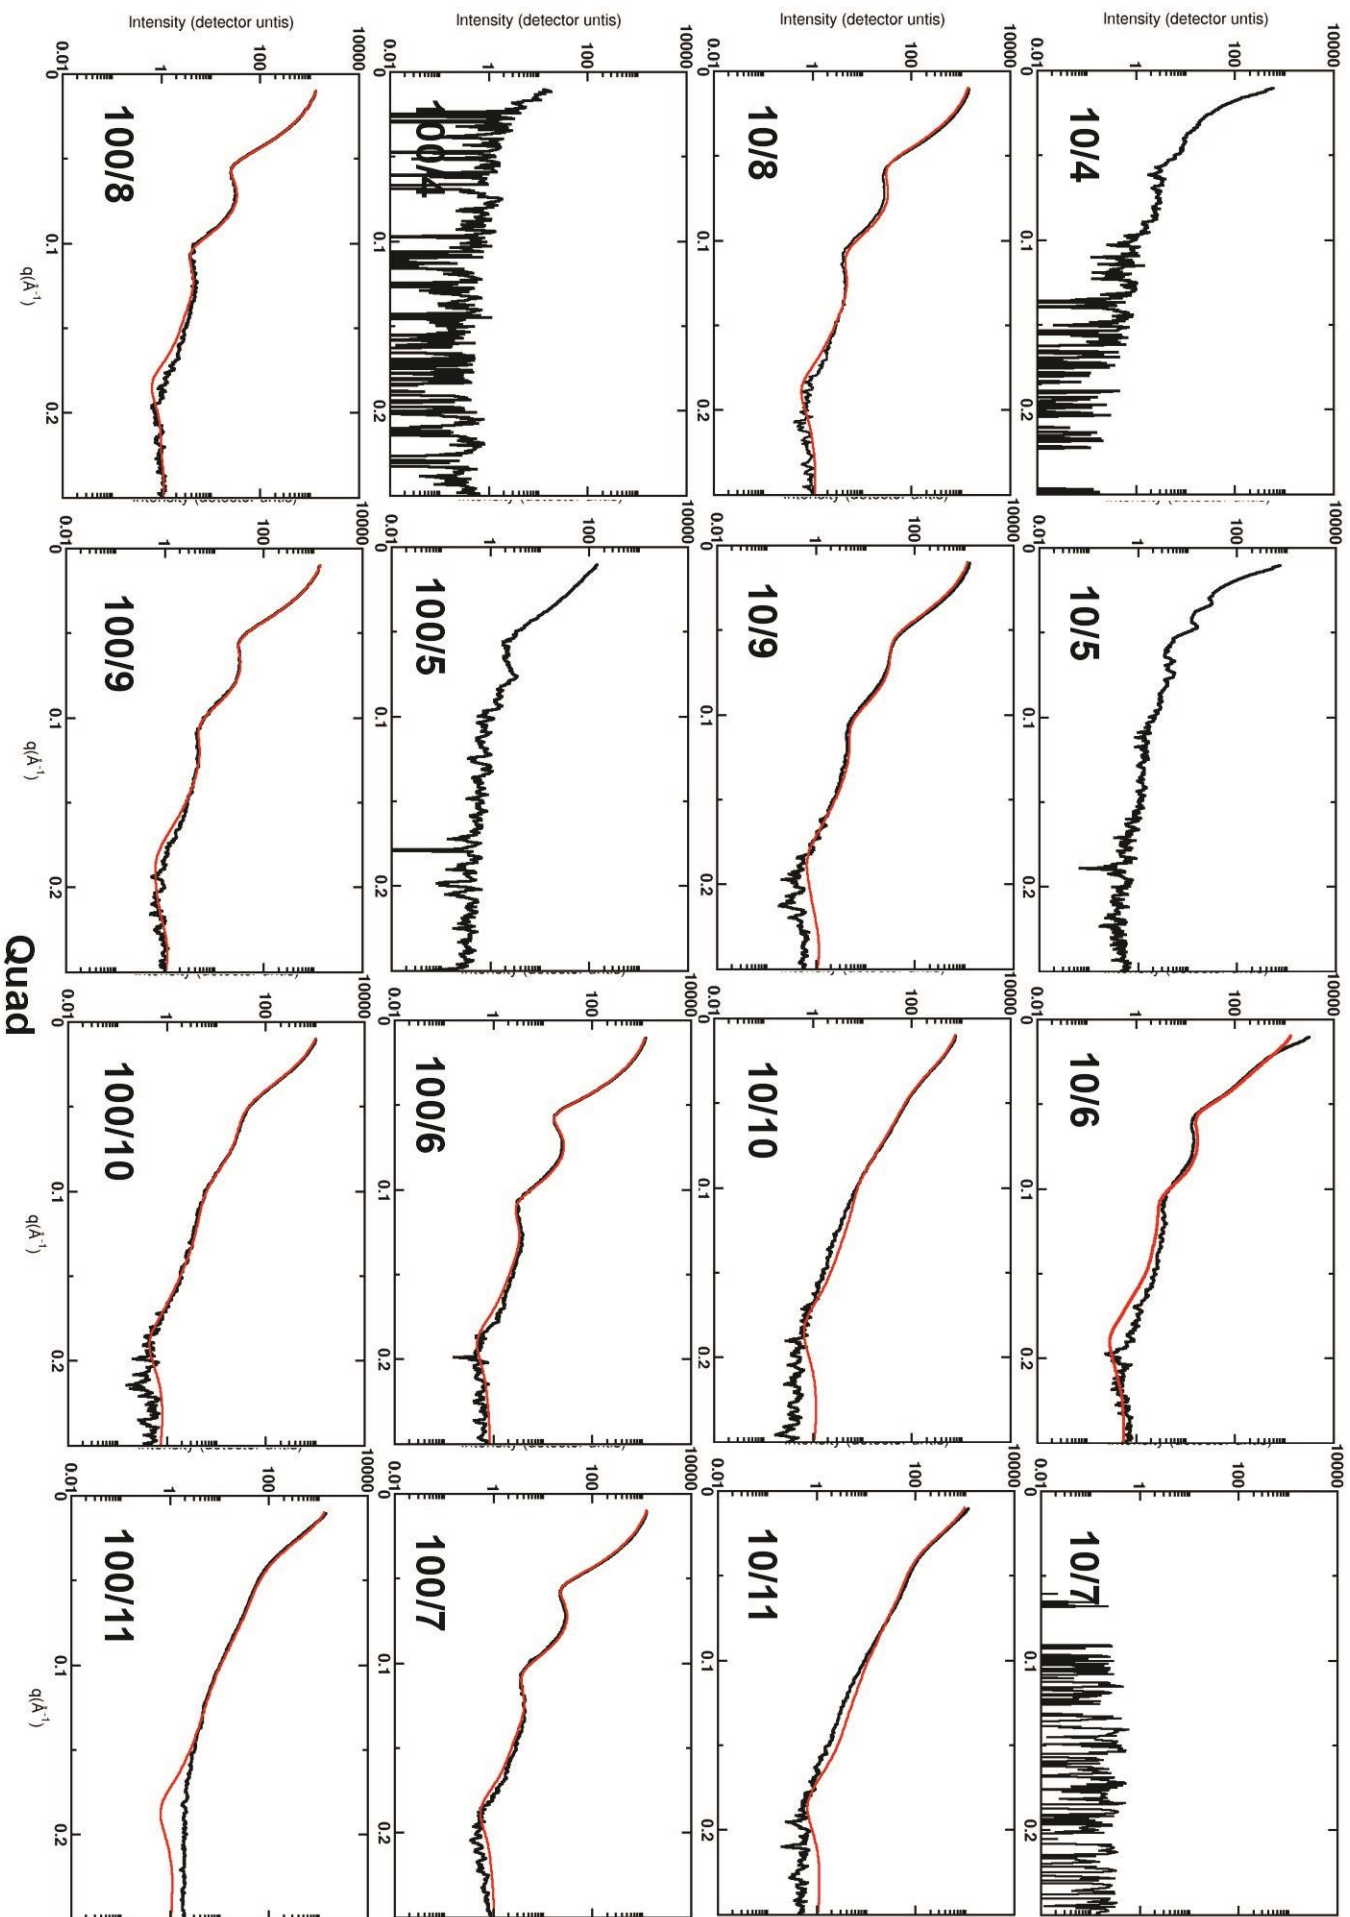

**fig. S4. Page 3 of 4. Scattering profiles and their fits.** pH. Cage variant designated at bottom center of page.

Salt and pH are indicated in lower left corner for each profile mM/

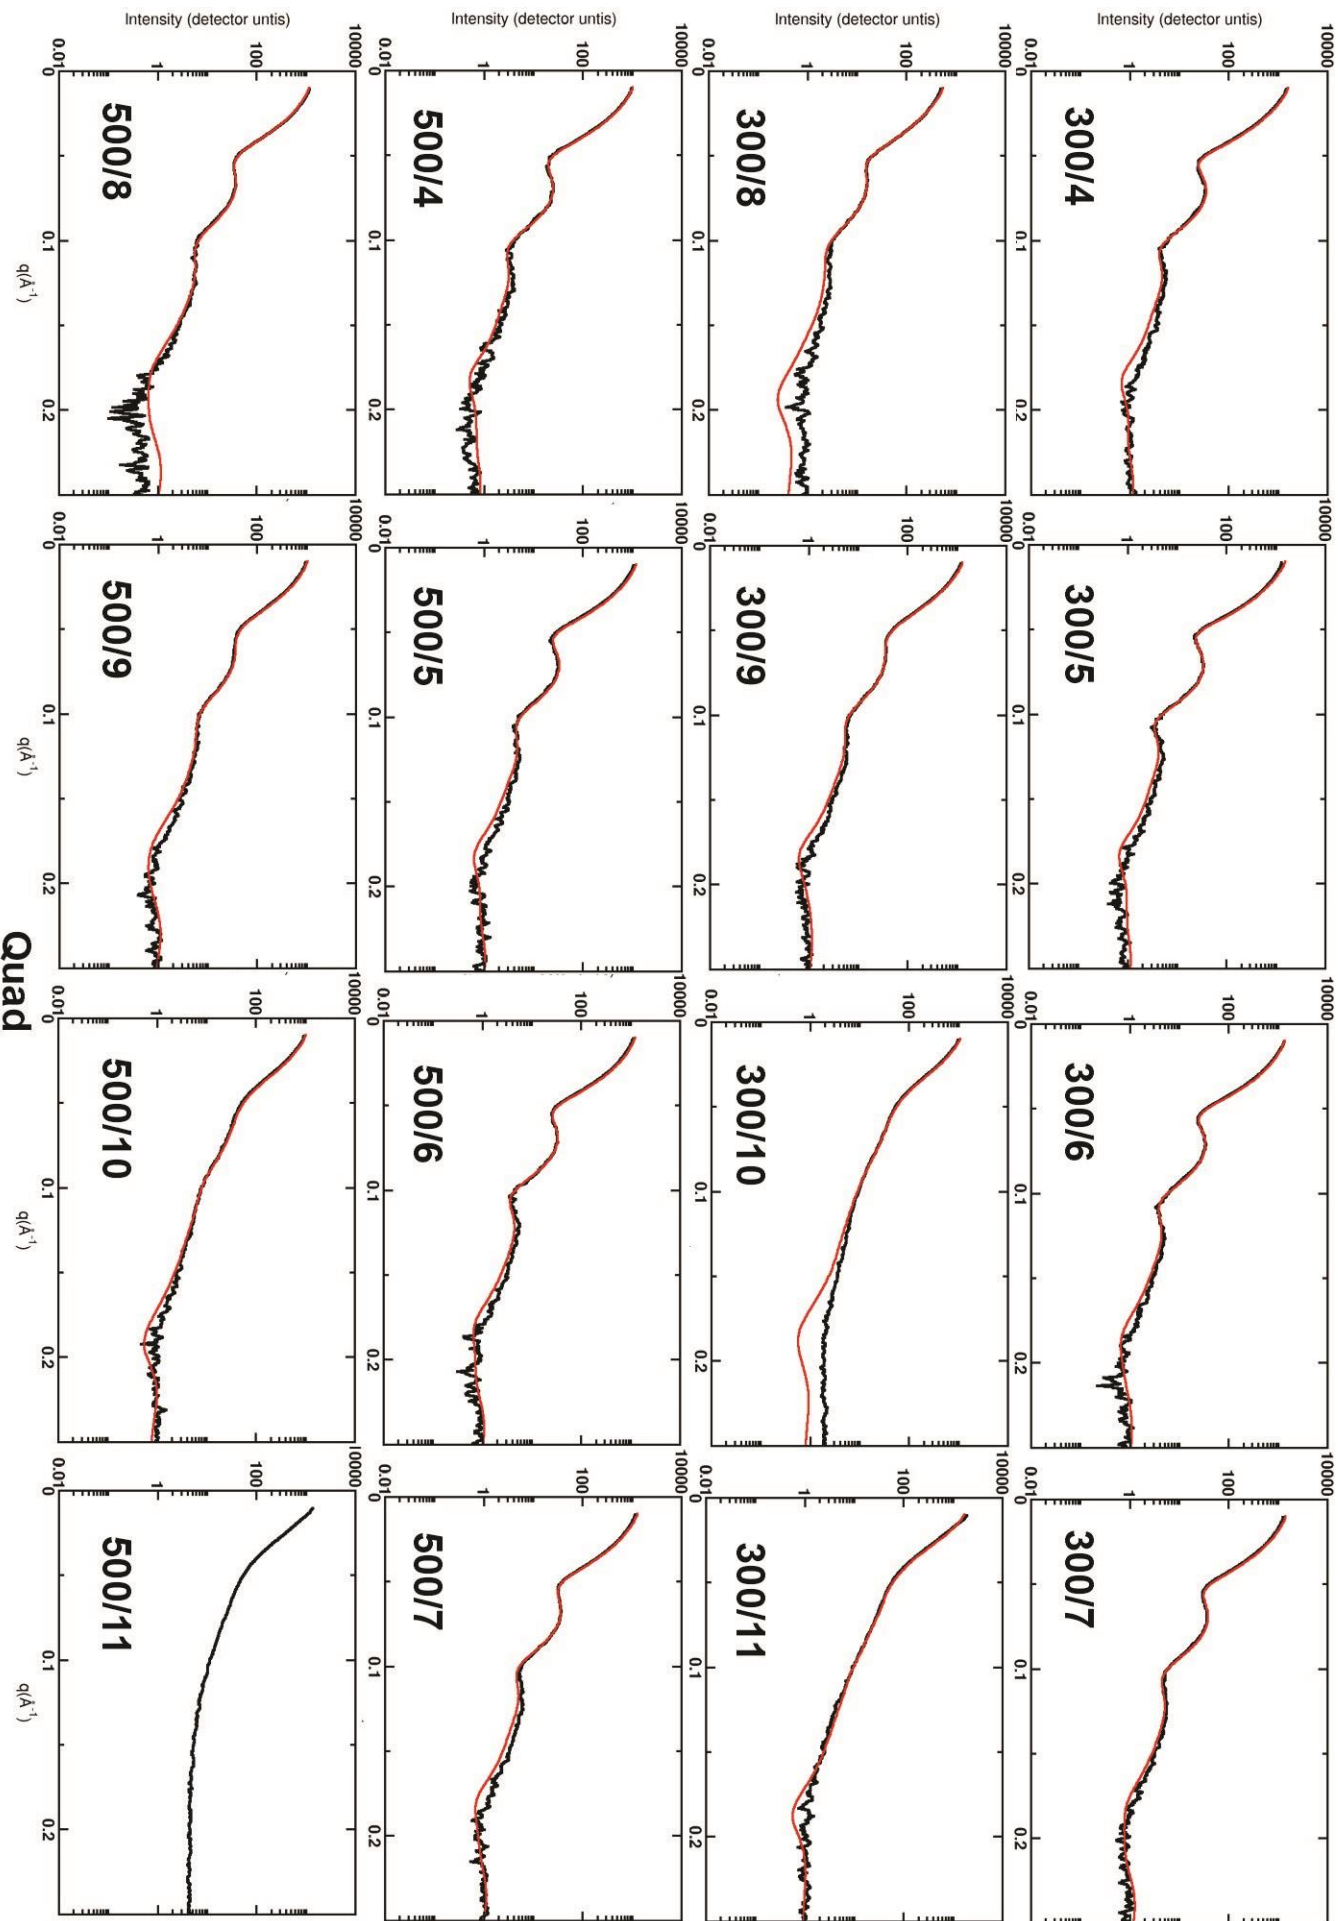

**fig. S4. Page 4 of 4. Scattering profiles and their fits.** Salt and pH are indicated in lower left corner for each profile mM/pH. Cage variant designated at bottom center of page.

Salt and pH are indicated in lower left corner for each profile mM/

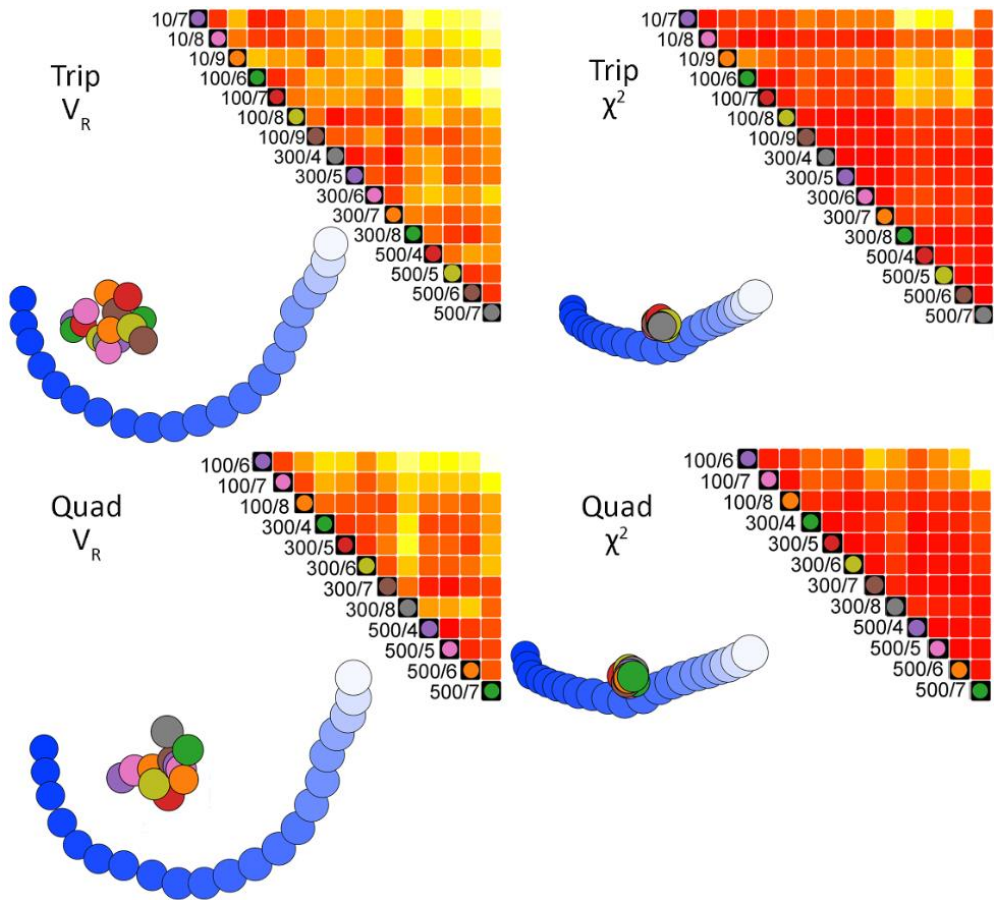

fig. S5. Heat map and force plot analysis using  $V_R$  and  $\chi^2$ . PCtrip (top). PCquad (bottom).

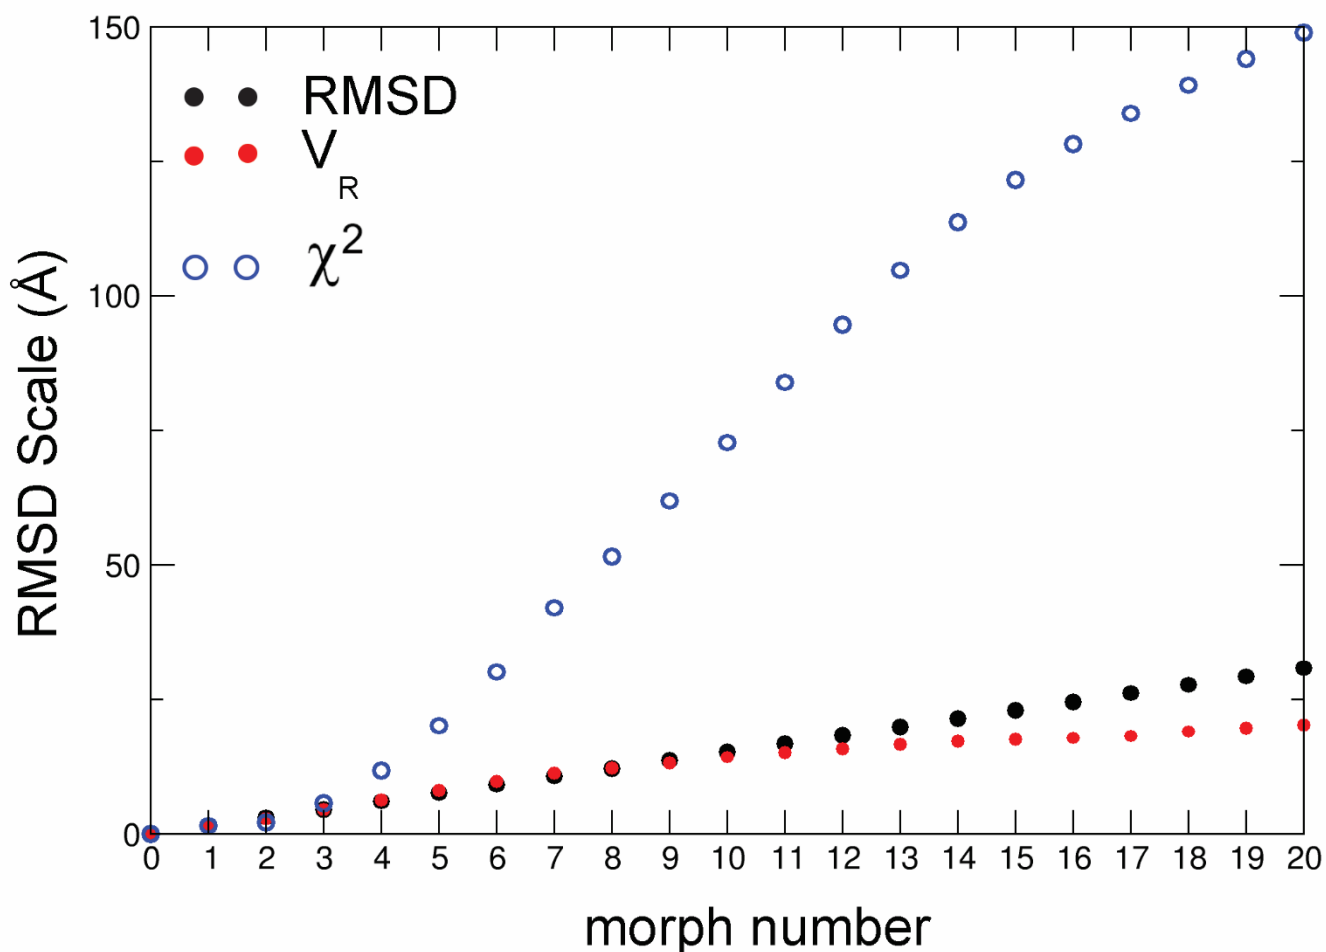

**fig. S6. Comparing RMSD changes measured from atomic models to the similarity of SAXS calculated from the same atomic models.** Twenty atomic models were generated in a morphed trajectory between our most compact crystal structure (model 0) and our idealized symmetric model (See Supplementary Movie 1). The first model was individually compared (ordinate axis) against all subsequent models using root mean square deviation (RMSD, black circles). SAXS curves were calculated and similarly was measured using two metrics;  $V_R$  and  $\chi^2$ . (red solid and blue open circles, respectively). The two SAXS similarity metrics are scaled to RMSD by finding the scale constant between the RMSD value calculated between the first and second models along the morph trajectory. This scale factor is applied for all subsequent values of the metric.

**table S4. Multimeric composition from fitting SAXS results from PCtrip.** Blue fields identify conditions where cages are fit to be a majority of the macromolecule in solution as indicated by % cage.

| Condition mM/pH | % Disassembled | % Cage | % Aggregate | X <sup>2</sup> of fit |
|-----------------|----------------|--------|-------------|-----------------------|
| 10/6            | 0.00           | 29.40  | 70.60       | 8.25                  |
| 10/7            | 4.21           | 95.79  | 0.00        | 0.32                  |
| 10/8            | 7.59           | 86.50  | 5.91        | 12.80                 |
| 10/9            | 11.06          | 58.54  | 30.40       | 8.34                  |
| 10/10           | 94.60          | 5.40   | 0.00        | 5.06                  |
| 10/11           | 65.70          | 34.30  | 0.00        | 0.47                  |
|                 |                |        |             |                       |
| 100/6           | 5.53           | 85.07  | 9.40        | 1.03                  |
| 100/7           | 4.50           | 89.44  | 6.06        | 0.85                  |
| 100/8           | 11.60          | 72.30  | 16.10       | 0.74                  |
| 100/9           | 8.90           | 53.93  | 37.17       | 0.75                  |
| 100/10          | 50.75          | 34.19  | 15.06       | 0.57                  |
| 100/11          | 55.82          | 22.08  | 22.10       | 0.37                  |
|                 |                |        |             |                       |
| 300/4           | 3.70           | 89.70  | 6.60        | 0.47                  |
| 300/5           | 6.90           | 72.80  | 20.30       | 0.67                  |
| 300/6           | 6.58           | 93.42  | 0.00        | 0.80                  |
| 300/7           | 6.73           | 93.27  | 0.00        | 0.75                  |
| 300/8           | 14.82          | 60.78  | 24.40       | 0.89                  |
| 300/10          | 46.92          | 3.18   | 49.90       | 7.57                  |
| 300/11          | 45.15          | 44.05  | 10.80       | 2.84                  |
|                 |                |        |             |                       |
| 500/4           | 9.72           | 50.99  | 39.29       | 0.91                  |
| 500/5           | 3.60           | 70.80  | 25.60       | 1.30                  |
| 500/6           | 4.85           | 80.55  | 14.60       | 1.22                  |
| 500/7           | 22.90          | 76.43  | 0.67        | 0.30                  |
| 500/8           | 16.37          | 78.07  | 5.56        | 0.88                  |
| 500/9           | 13.89          | 77.71  | 8.40        | 0.85                  |
| 500/10          | 44.20          | 29.70  | 26.10       | 1.08                  |
| 500/11          | 31.63          | 9.65   | 58.72       | 0.52                  |



**table S5. Multimeric composition from fitting SAXS results from PCquad.**

| <b>Condition<br/>mM/pH</b> | <b>%<br/>Disassembled</b> | <b>% Cage</b> | <b>% Aggregate</b> | <b>X<sup>2</sup> of fit</b> |
|----------------------------|---------------------------|---------------|--------------------|-----------------------------|
| 10_6                       | 5.00                      | 0.20          | 94.80              | 17.00                       |
| 10_8                       | 14.27                     | 48.23         | 37.50              | 25.08                       |
| 10_9                       | 17.60                     | 22.59         | 59.81              | 22.40                       |
| 10_10                      | 78.93                     | 21.07         | 0.00               | 3.89                        |
| 10_11                      | 51.00                     | 0.30          | 48.70              | 8.82                        |
|                            |                           |               |                    |                             |
| 100_6                      | 3.80                      | 59.30         | 36.90              | 2.68                        |
| 100_7                      | 8.23                      | 76.97         | 14.80              | 5.02                        |
| 100_8                      | 8.60                      | 70.20         | 21.20              | 1.13                        |
| 100_9                      | 9.80                      | 26.93         | 63.27              | 0.63                        |
| 100_10                     | 33.85                     | 0.05          | 66.10              | 0.50                        |
| 100_11                     | 56.88                     | 0.00          | 43.12              | 7.27                        |
|                            |                           |               |                    |                             |
| 300_4                      | 12.40                     | 50.64         | 36.96              | 0.93                        |
| 300_5                      | 4.07                      | 59.90         | 36.03              | 0.96                        |
| 300_6                      | 19.25                     | 65.50         | 15.26              | 0.71                        |
| 300_7                      | 9.95                      | 59.68         | 30.37              | 0.85                        |
| 300_8                      | 25.77                     | 63.43         | 10.80              | 1.23                        |
| 300_9                      | 40.60                     | 50.50         | 8.90               | 1.17                        |
| 300_10                     | 15.24                     | 0.00          | 84.76              | 5.87                        |
| 300_11                     | 45.45                     | 0.05          | 54.50              | 0.69                        |
|                            |                           |               |                    |                             |
| 500_4                      | 31.10                     | 60.91         | 7.99               | 0.46                        |
| 500_5                      | 9.55                      | 61.25         | 29.20              | 0.69                        |
| 500_6                      | 9.40                      | 52.30         | 38.30              | 1.21                        |
| 500_7                      | 8.07                      | 65.36         | 26.57              | 1.82                        |
| 500_8                      | 15.67                     | 42.37         | 41.96              | 1.19                        |
| 500_9                      | 26.13                     | 36.08         | 37.79              | 0.60                        |
| 500_10                     | 38.90                     | 28.30         | 32.80              | 0.43                        |

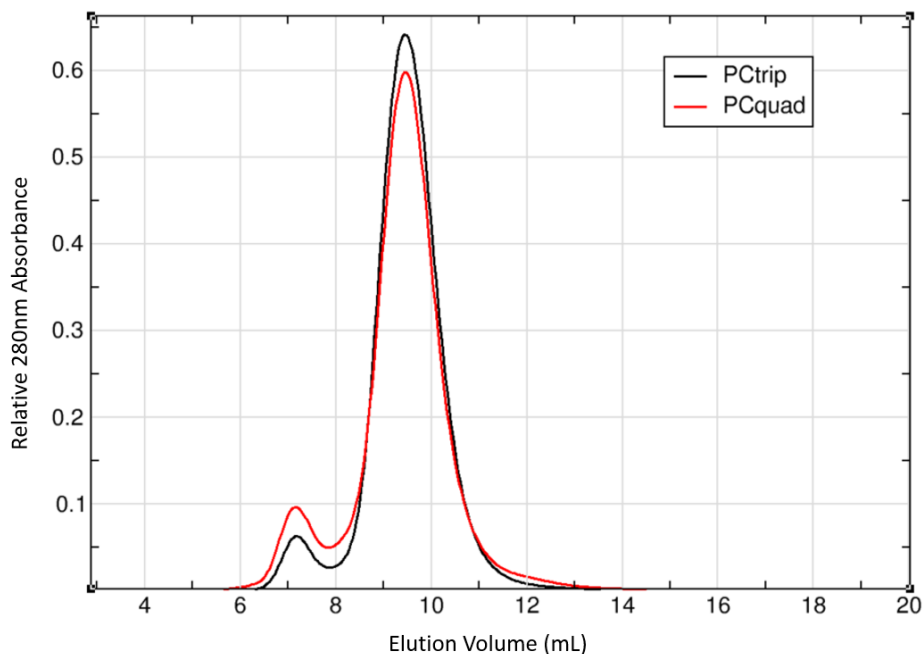

**fig. S7. Purity of PCtrip and PCquad after affinity purification and SEC.** After affinity purification and concentration to greater than 30mg/ml, PCtrip (black) and PCquad (red) were injected onto SEC in a running buffer of 100mM NaCl at pH 8. Fractions from the center of the major peak were used for SAXS measurements. To normalize for variation in injection concentration, the area under the SEC peaks are both set equal to 1.

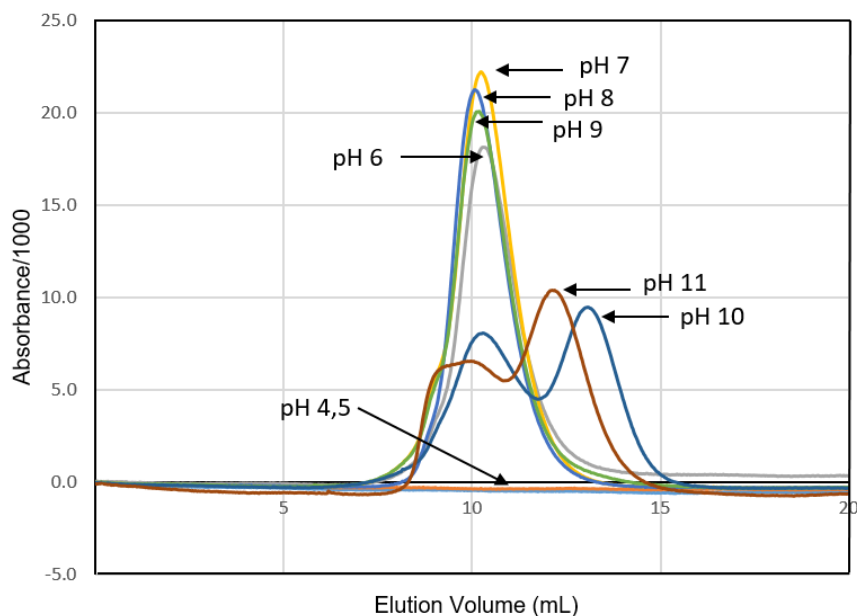

**fig. S8. PCtrip multimerization as a function of pH as probed by SEC.** To test and compliment SAXS analysis, SEC was performed with running buffers 100mM NaCl varying pH by a single unit from 4 to 11 for PCtrip. The peak centered just after 10mL of elution is proportional to the amount of dodecameric cage. The second peak eluting at greater than 11 mL contains smaller fragments. Prior to injection onto SEC, samples were centrifuged at high speeds to remove aggregates. Otherwise the preparations were identical to those used for SAXS.

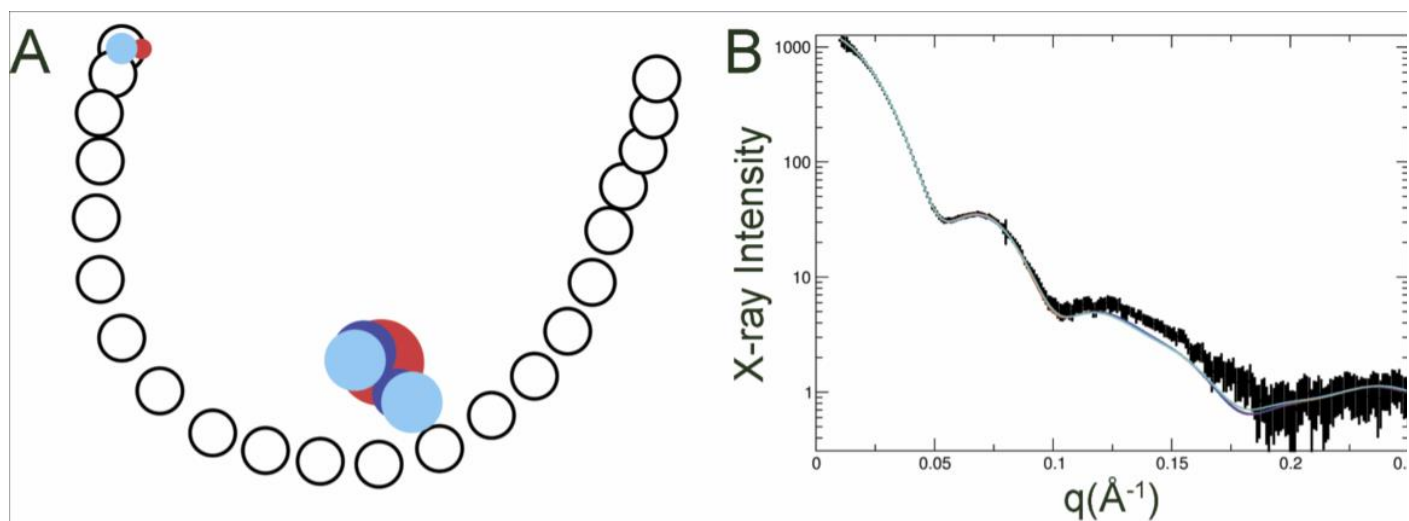

**fig. S9. Minimalist ensembles with nearly equivalent fits to SAXS data.** SAXS data from *PCquad* in condition 500mM NaCl at pH 7 was fit three times identifying minimal ensembles with near equivalent fits. (A) A force plot is shown for the landmark morphing (black circles) between the most compact crystal structure (top left) and the idealized cage (top right), an ensemble that is composed almost entirely (97%) of one cage conformation with only a minor alternate component (red), a two component ensemble with nearly equal weighting for each member (dark blue), and a three component ensemble (light blue). The circle areas of individual components are shown proportional to their percentage contributions to the total ensemble. (B) The experimental SAXS curve is shown with error bars (black), along with fits to nearly indistinguishable curves calculated from ensembles composed of a nearly single member (red), a two member ensemble (dark blue), and a three member ensemble (light blue).
